# Supplementary material for: Activation of BDNF-TrkB Signaling in Specific Structures of the Sheep Brain by Kynurenic Acid
Source: Preprints.org preprint supplement (doi:10.20944/preprints202410.1272.v1), 2024-10-16
Supplement: Supplementary file 1 [file supplementary]

## Sheet: Arkusz1
Figure 3
