# Supplementary figures and images for: Activation of BDNF-TrkB Signaling in Specific Structures of the Sheep Brain by Kynurenic Acid
Source: Preprints.org preprint supplement (doi:10.20944/preprints202410.1272.v1), 2024-10-16

Figure 2

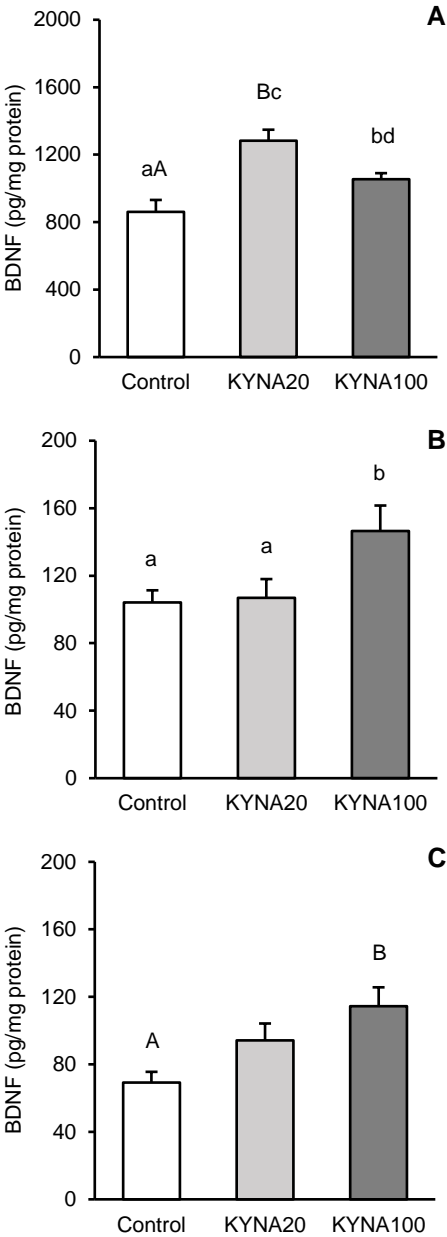

Supplement: Supplementary file 1 [file supplementary]

Figure 1

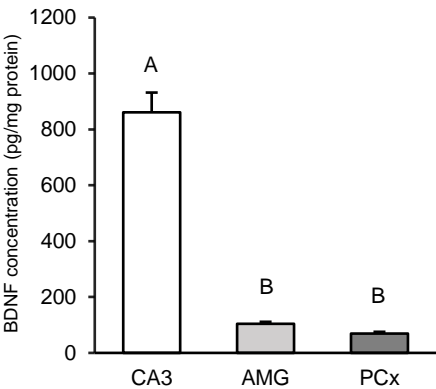

Supplement: Supplementary file 2 [file supplementary]

Figure 4

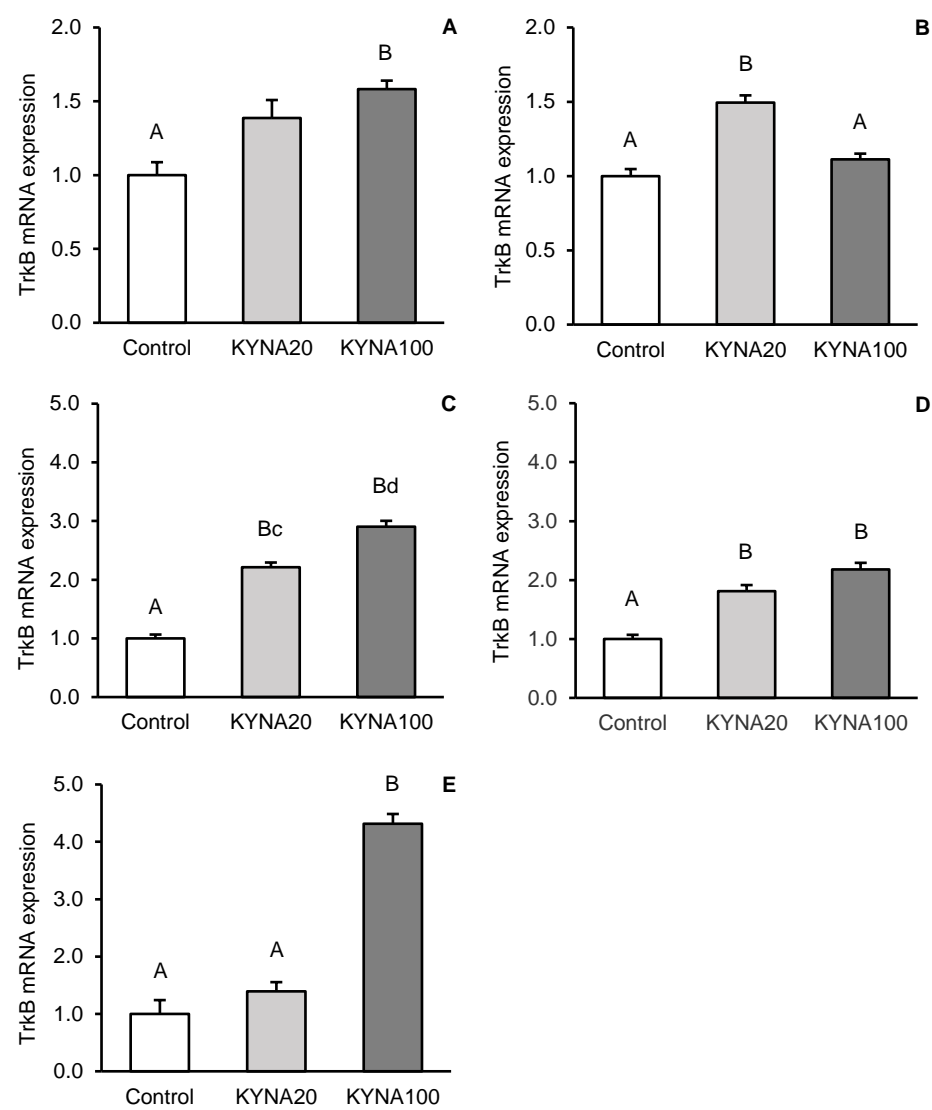

Supplement: Supplementary file 3 [file supplementary]

Figure 3

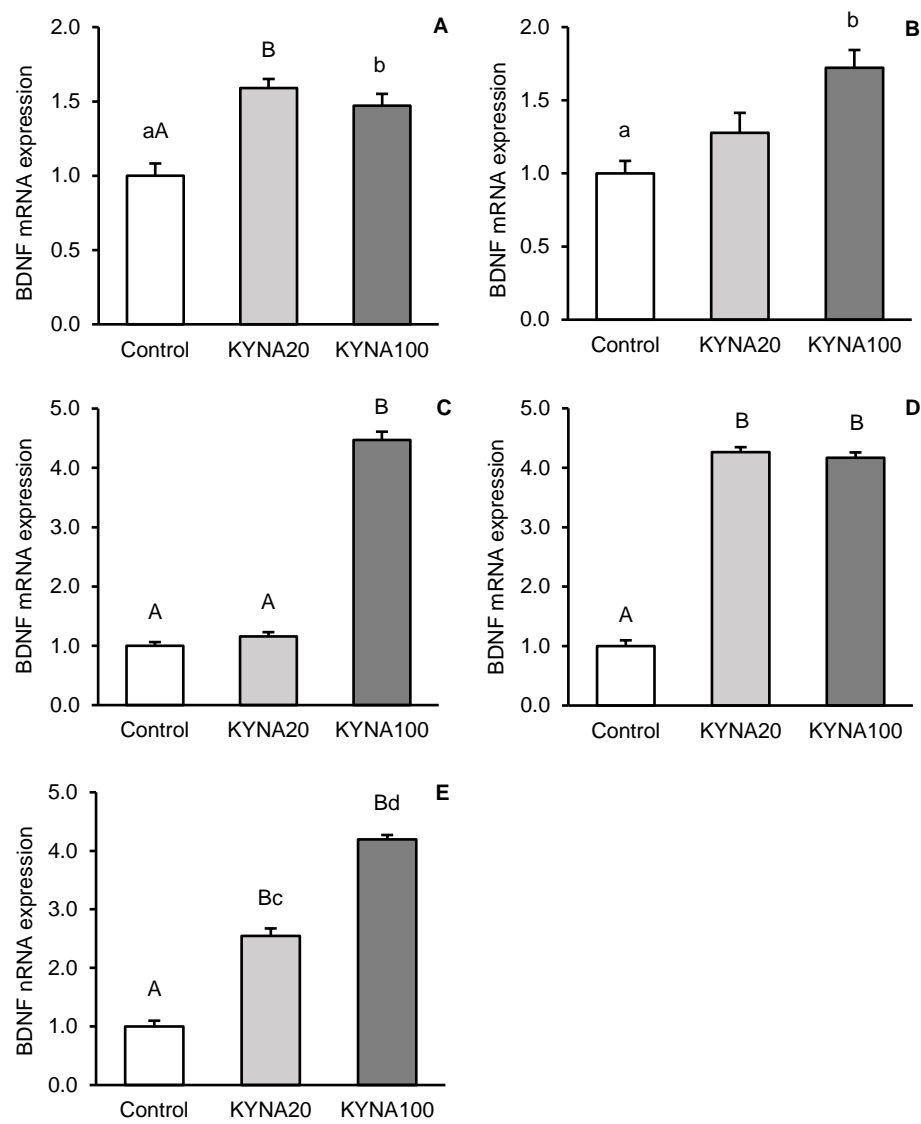

Supplement: Supplementary file 4 [file supplementary]
